# Supplementary material for: A new method for measuring optical scattering properties of atmospherically relevant dusts using the Cloud and Aerosol Spectrometer with Polarization (CASPOL)
Source: Copernicus journal article supplement (doi:10.5194/acp-13-1345-2013), 2013-02-01
Supplement: Supplementary file 1 [file acp-13-1345-2013-supplement.pdf]

1 **Supplement A - A New Method for Measuring Optical Scattering Properties of Atmospherically**  
2 **Relevant Dusts Using the Cloud and Aerosol Spectrometer with Polarization (CASPOL)**

3

4 **Andrew Glen and Sarah. D. Brooks\***

5

6

7 \*To whom correspondence should be addressed. E-mail: [sbrooks@tamu.edu](mailto:sbrooks@tamu.edu).

8

9

10 Department of Atmospheric Sciences,  
11 MS 3150, Texas A&M University,  
12 College Station, Texas, 77843-3150

13           While the laboratory data collected by the CASPOL is very promising, one consideration is that  
14 the particle concentrations generated in this study are drastically higher than those in the atmosphere.  
15 To test of the feasibility of using CASPOL to sample dust storm particles in-situ, we have produced  
16 scattering signatures based on an atmospherically relevant number concentration of particles during a  
17 high dust event. Iwasaka et al. (1983) reported dust concentrations of  $50 \text{ cm}^{-3}$  (upper atmosphere) and  
18  $225 \text{ cm}^{-3}$  (lower atmosphere) during an Asian dust event. Similar values have been reported by Gringel  
19 and Muhleisen (1977) and Prodi and Fea (1979). Thus, we estimate that a CASPOL mounted on an  
20 aircraft during flight through a hypothetical dust storm would sample  $\sim 50$  dust particles per  $\text{cm}^{-3}$  or  
21 more. Assuming the standard CASPOL flow rate ( $1.2 \text{ L min}^{-1}$ ),  $\geq \sim 60,000$  particles would be detected  
22 in a one minute sampling period within the dust storm. Applying the analysis technique described in  
23 Section 3.5, we generated signature plots for 60,000 particles of each dust type instead of the original  
24 concentrations approximately  $10^5$  particles.

25           The results of this estimation can be seen in Figure S1, which shows that for the three  
26 representative dusts discussed, the shape, position and relative intensities of the signatures are  
27 comparable to the ones generated from the data with much larger aerosol concentrations (Figure 9).  
28 Thus we conclude that the same three Groups may be established, and that such data might be obtained  
29 when flying through a dust storm or during other intense atmospheric dust phenomena even when  
30 sampling times may be quite short.

31

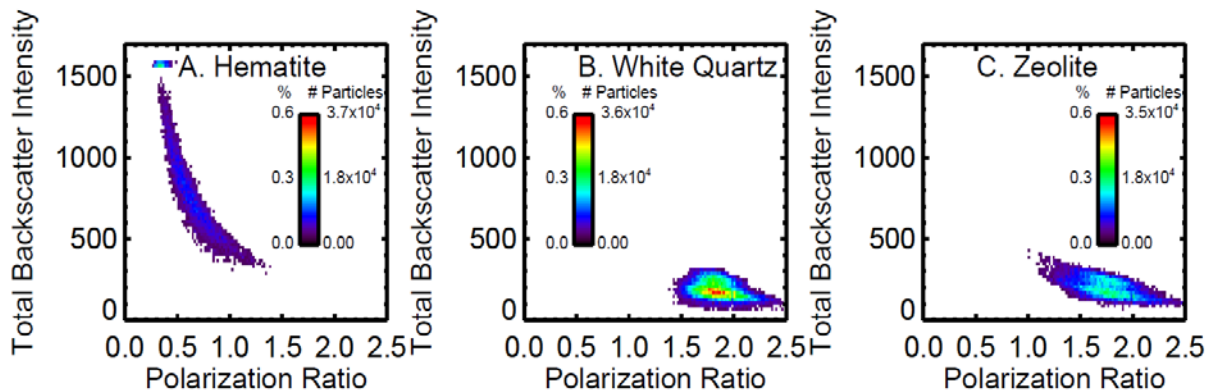

32

33 **Figure S1. The total backscatter intensity vs. polarization ratio for representative members of the**  
 34 **optical scattering Groups A (hematite), B (white quartz) and C (zeolite), using a total number of**  
 35 **particles of 60,000.**

36

37 **Supplemental References**

38 Gringel, W., and Muhleisen, R.: Sahara dust concentration in the troposphere over the north Atlantic  
 39 derived from measurements of air conductivity, *Beitr. Phys. Atmos.*, 51, 121-128, 1977.

40 Iwasaka, Y., Minoura, H., and Nagaya, K.: The transport and spacial scale of Asian dust-storm clouds:  
 41 a case study of the dust-storm event of April 1979, *Tellus B*, 35B, 189-196, 10.1111/j.1600-  
 42 0889.1983.tb00023.x, 1983.

43 Prodi, F., and Fea, G.: A Case of Transport and Deposition of Saharan Dust Over the Italian Peninsula  
 44 and Southern Europe, *J. Geophys. Res.*, 84, 6951-6960, 10.1029/JC084iC11p06951, 1979.
